# Supplementary material for: Experience in Multiple Sclerosis Patients with COVID-19 and Disease-Modifying Therapies: A Review of 873 Published Cases
Source: PubMed Central journal article supplement (PMC7766122; doi:10.3390/jcm9124067), 2020-12-16
Supplement: jcm-09-04067-s001.pdf [file jcm-09-04067-s001.pdf]

| Paper, author                                                   | Sex (m/f) | Age (years) | RRMS/PPMS/SPMS | Actual EDSS | Duration MS (years) | Recent MS therapy (duration) | Previous MS therapies                                                | relevant comorbidities (esp. Cardiovascular risk factors)                        | COVID-19 symptoms                                                  | COVID drug therapy                                   | Outcome COVID-19                                                                        |
|-----------------------------------------------------------------|-----------|-------------|----------------|-------------|---------------------|------------------------------|----------------------------------------------------------------------|----------------------------------------------------------------------------------|--------------------------------------------------------------------|------------------------------------------------------|-----------------------------------------------------------------------------------------|
| Aguirre et al, Multiple Sclerosis and related disorders         | m         | 18          | RRMS           | 1.5         | 7                   | Natalizumab (6 months)       | Interferon beta 1-a, DMF                                             | None                                                                             | Fever, cough, malaise                                              | Hydroxychloroquine, antibiotics                      | Hospitalized for 1 week, discharged without residual symptoms                           |
| Arca et al, SN comprehensive clinical medicine                  | f         | 58          | N/A            | N/A         | N/A                 | Fingolimod                   |                                                                      | Chronic migraine (fremanezumab therapy)                                          | Cough, fever, generalized weakness, headache, shortness of breath  | Hydroxychloroquine, antibiotics                      | <b>Intensive care unit treatment, intubation, complete recovery</b>                     |
| Barzegar et al, Neurol Neuroimmunol Neuroinflamm                | f         | 42          | RRMS           | 1.0         | 19                  | Fingolimod (4 years)         | Methotrexate, interferon beta 1-a                                    | Hypothyroidism, recurrent urinary tract infection, history of pulmonary embolism | Dry cough, dyspnea, fever, tachycardia, increased respiratory rate | Hydroxychloroquine                                   | Hospitalized for 13 days, discharged without residual symptoms                          |
| Bollo et al, J Neurological Sciencs                             | f         | 34          | RRMS           | 2.5         | 4                   | Fingolimod (3 years)         | DMF                                                                  | N/A                                                                              | Fever, pharyngeal pain                                             | Hydroxychloroquine, lopinavir/ritonavir              | Hospitalized, discharged without residual symptoms                                      |
|                                                                 | f         | 58          | RRMS           | 2.5         | 5                   | Teriflunomide (4 years)      | Interferon beta 1-a                                                  | N/A                                                                              | Fever, diarrhea                                                    | Hydroxychloroquine, lopinavir/ritonavir, antibiotics | Hospitalized, need for oxygen support, discharged without residual symptoms             |
| Borriello & Ianniello, Multiple Sclerosis and related disorders | m         | 28          | RRMS           | 1.5         | 20                  | Natalizumab (21 months)      | DMF                                                                  | None                                                                             | Fever, dyspnea                                                     | Hydroxychloroquine, antipyretics, antibiotics        | Hospitalized for 10 days, discharged without residual symptoms                          |
| Carandini et al, Multiple Sclerosis Journal                     | f         | 25          | RRMS           | N/A         | 1                   | Alemtuzumab (1 year)         | None                                                                 | None                                                                             | Dry cough, fatigue, fever                                          | None                                                 | Not hospitalized, mild symptoms, complete recovery                                      |
| Celius, Multiple Sclerosis and related disorders                | f         | 35          | RRMS           | N/A         | 2                   | Cladribine (1 year)          | Fingolimod                                                           | None                                                                             | Anosmia, slight fever                                              | None                                                 | Not hospitalized, mild symptoms, complete recovery                                      |
| Chiarini et al, Journal of Neuroimmunology                      | f         | 45          | RRMS           | 6.5         | 24                  | Fingolimod (3 years)         | Interferon beta 1-a, glatiramer acetate, mitoxantrone, teriflunomide | <b>Obesity</b>                                                                   | Fever, asthenia                                                    | Hydroxychloroquine, lopinavir/ritonavir, paracetamol | Hospitalized for 15 days, need for oxygen support, discharged without residual symptoms |
| Ciardi et al, Journal of Neuroimmunology                        | f         | 62          | RRMS           | 6.0         | N/A                 | Teriflunomide (5 years)      | N/A                                                                  | N/A                                                                              | Fever, dyspnea, severe fatigue, dry cough, diarrhea                | Hydroxychloroquine, lopinavir/ritonavir              | Hospitalized, discharged without residual symptoms                                      |
| Conte, Multiple Sclerosis and related disorders                 | f         | 48          | N/A            | N/A         | N/A                 | Ocrelizumab                  | N/A                                                                  | N/A                                                                              | Fever, upper respiratory symptoms, malaise                         | Hydroxychloroquine, antibiotics                      | Hospitalized for 3 days, prolonged symptomatic period (7 weeks)                         |
| De Angelis et al, Multiple Sclerosis and related disorders      | m         | 29          | RRMS           | 1.5         | 2                   | Cladribine (19 months)       | None                                                                 | None                                                                             | Anosmia, dysgeusia, diahorea, fever                                | None                                                 | Not hospitalized, mild symptoms, complete recovery                                      |
|                                                                 | f         | 61          | RRMS           | 2.5         | 26                  | Cladribine (17 months)       | Interferon beta 1-a, fingolimod                                      | <b>Hypertension, dyslipidemia</b>                                                | No symptoms                                                        | None                                                 | Not hospitalized, no symptoms                                                           |
| Dersch et al, Multiple Sclerosis Journal                        | m         | 59          | RRMS           | N/A         | 4                   | Cladribine (2 weeks)         | DMF                                                                  | N/A                                                                              | Fever, malaise, progressive respiratory symptoms                   | Hydroxychloroquine, antibiotics, aviptadil           | Hospitalized for 16 days, discharged without residual symptoms                          |
| Devogelaere et al, Neurological Sciences                        | f         | 33          | RRMS           | 8.0         | 16                  | Rituximab (6 months)         | Interferon beta 1-a                                                  | N/A                                                                              | Fever, muscle soreness, headache, cough, mild dyspnea              | None                                                 | Hospitalized, discharged without residual symptoms                                      |
| Fernandez-Diaz et al, Multiple Sclerosis and related disorders  | m         | 43          | RRMS           | 0           | N/A                 | Alemtuzumab                  | N/A                                                                  | None                                                                             | Fever, cough, myalgia, shortness of breath                         | Hydroxychloroquine, lopinavir/ritonavir, antibiotics | Not hospitalized, mild symptoms, complete recovery                                      |
|                                                                 | f         | 30          | RRMS           | 2.5         | N/A                 | Alemtuzumab (1 year)         | None                                                                 | None                                                                             | Fever, cough, dyspnea                                              | Hydroxychloroquine, antibiotics                      | Hospitalized, discharged without residual symptoms                                      |
| Celsi&Lorna, Multiple Sclerosis and related disorder            | f         | 24          | RRMS           | 0           | 1.5                 | Alemtuzumab (15 months)      | None                                                                 | N/A                                                                              | Cough, myalgia                                                     | None                                                 | Not hospitalized, mild symptoms, complete recovery                                      |
| Foerch et al, Multiple Sclerosis and related disorders          | f         | 57          | RRMS           | 2.0         | 10                  | Fingolimod (9 years)         | None                                                                 | N/A                                                                              | Fever, cough, low peripheral oxygen saturation                     | None                                                 | <b>Intensive care unit treatment, non-invasive ventilation, complete recovery</b>       |

|                                                              |     |     |      |     |     |                               |                                              |                                                             |                                                       |                                                      |                                                                                              |
|--------------------------------------------------------------|-----|-----|------|-----|-----|-------------------------------|----------------------------------------------|-------------------------------------------------------------|-------------------------------------------------------|------------------------------------------------------|----------------------------------------------------------------------------------------------|
| Gemcioglu et al, Multiple Sclerosis and related disorders    | m   | 31  | N/A  | N/A | 2   | interferon beta 1-a (2 years) | None                                         | None                                                        | Cough, shortness of breath                            | Hydroxychloroquine, antibiotics                      | Hospitalized for 5 days, discharged without residual symptoms                                |
| Ghajarzadeh et al, Multiple Sclerosis and related disorders  | f   | 39  | RRMS | 2.0 | 10  | Ocrelizumab (3 months)        | Interferon beta 1-a                          | Epilepsy                                                    | Fever, mild dyspnea                                   | None                                                 | Not hospitalized, mild symptoms, complete recovery                                           |
| Gomez-Mayordomo et al,                                       | m   | 57  | RRMS | 6.0 | 24  | Fingolimod (7 years)          | Interferon beta 1-a                          | N/A                                                         | Fever, malaise                                        | Hydroxychloroquine                                   | Hospitalized, delayed clinical exacerbation of COVID-1, discharged without residual symptoms |
| Guevara et al, Multiple Sclerosis and related disorders      | m   | 35  | RRMS | N/A | 1.5 | Alemtuzumab (1.5 years)       | None                                         | None                                                        | Mild fever, cough                                     | None                                                 | Not hospitalized, mild symptoms, complete recovery                                           |
| Iannetta et al, Multiple Sclerosis and related disorders     | f   | 36  | RRMS | 5.5 | 2   | Ocrelizumab (1 year)          | N/A                                          | Papillary thyroid carcinoma                                 | Cough, coryza                                         | None                                                 | Hospitalized, discharged without residual symptoms                                           |
|                                                              | m   | 54  | SPMS | 7.0 | 17  | Ocrelizumab (1.5 year)        | Interferon beta 1-a, fingolimod              | Deep venous thrombosis                                      | Fever                                                 | None                                                 | Hospitalized, discharged without residual symptoms                                           |
| Louapre et al, Revue neurologique                            | f   | N/A | SPMS | 6.0 | 28  | Ocrelizumab (2 weeks)         | Interferon beta 1-a, fingolimod, natalizumab | <b>Hypertension, dyslipidemia</b>                           | No symptoms                                           | None                                                 | Not hospitalized, no symptoms                                                                |
|                                                              | f   | 56  | RRMS | 8.0 | 21  | Natalizumab (13 yers)         | Interferon beta 1-a, glatiramer acetate      | <b>COPD, epilepsy</b>                                       | Fever, cough                                          | N/A                                                  | Hospitalized, discharged without residual symptoms                                           |
| Lucchini et al, Multiple Sclerosis and related disorders     | f   | 60  | RRMS | 2.5 | 8   | Ocrelizumab (1 year)          | Glatiramer acetate, DMF, fingolimod          | N/A                                                         | Fever, cough                                          | Antibiotics, prednisone                              | Not hospitalized, mild symptoms, complete recovery                                           |
| Maghzi et al, Journal of Neurology                           | m   | 52  | RIS  | 0   | 3   | Teriflunomide (3 years)       | None                                         | Obstructive sleep apnea, <b>hyperlipidemia</b> , depression | Fatigue, headache, hyposmia, myalgia, fever, diarrhea | None                                                 | Not hospitalized, complete recovery                                                          |
|                                                              | f   | 52  | RRMS | N/A | 18  | Teriflunomide (3.5 years)     | N/A                                          | None                                                        | Fever, headache, nausea, vomiting, hyposmia           | None                                                 | Not hospitalized, complete recovery                                                          |
|                                                              | m   | 47  | RRMS | N/A | 5   | Teriflunomide (4 years)       | Interferon beta 1-a                          | None                                                        | Diarrhea, cough, dyspnea                              |                                                      | Not hospitalized, mild symptoms, complete recovery                                           |
|                                                              | m   | 38  | RRMS | N/A | 11  | Teriflunomide (5 months)      | Glatiramer acetate                           | Alcohol abuse, homelessness                                 | Fever, cough                                          | None                                                 | Not hospitalized, mild symptoms, complete recovery                                           |
|                                                              | f   | 79  | SPMS |     | 28  | Teriflunomide (2.5 years)     | Interferon beta 1-a                          | <b>Hypertension, recurrent urinary tract infections</b>     | Sore throat                                           | N/A                                                  | Hospitalized, discharged without residual symptoms                                           |
| Mallucci et al, Multiple Sclerosis and related disorders     | N/A | 37  | RRMS | 2.5 | 14  | Fingolimod (9 years)          | Interferon beta 1-a, natalizumab             | N/A                                                         | No symptoms                                           | None                                                 | Not hospitalized, no symptoms                                                                |
|                                                              | N/A | 49  | RRMS | 2.5 | 19  | Fingolimod (10 months)        | Interferon beta 1-a, glatiramer acetate      | N/A                                                         | No symptoms                                           | None                                                 | Not hospitalized, no symptoms                                                                |
| Meca-Lallana et al, Multiple Sclerosis and related disorders | m   | 60  | RRMS | 8.0 | 10  | Rituximab (3 years)           | Glatiramer acetate, natalizumab              | N/A                                                         | Fever, cough, dyspnea                                 | Hydroxychloroquine                                   | Hospitalized for 5 days, discharged without residual symptoms                                |
|                                                              | m   | 49  | RRMS | 3.0 | 6   | Ocrelizumab (3 years)         | Glatiramer acetate                           | <b>Smoking</b>                                              | Fever, cough, dyspnea                                 | Lopinavir/ritonavir                                  | Hospitalized for 5 days, discharged without residual symptoms                                |
|                                                              | m   | 45  | RRMS | 2.0 | 5   | Ocrelizumab (3 years)         | Teriflunomide                                | N/A                                                         | Fever, cough, dyspnea, myalgia                        | Hydroxychloroquine, lopinavir/ritonavir, antibiotics | Hospitalized for 4 days, discharged without residual symptoms                                |
|                                                              | f   | 25  | RRMS | 1.0 | 8   | Ocrelizumab (1 month)         | Natalizumab, fingolimod, rituximab           | N/A                                                         | No symptoms                                           | None                                                 | Not hospitalized, no symptoms                                                                |
|                                                              | f   | 36  | RRMS | 2.0 | 11  | Ocrelizumab (8 months)        | Glatiramer acetate, rituximab                | N/A                                                         | Fever, headache                                       | None                                                 | Not hospitalized, complete recovery                                                          |
|                                                              | f   | 60  | PPMS | 7.5 | 16  | Ocrelizumab (9 years)         | None                                         | N/A                                                         | Fever, cough, headache                                | None                                                 | Not hospitalized, complete recovery                                                          |
|                                                              | m   | 52  | RRMS | N/A | 11  | Ocrelizumab (1 year)          | Glatiramer acetate                           | N/A                                                         | No symptoms                                           | None                                                 | Not hospitalized, no symptoms                                                                |

|                                                                         |   |    |      |     |     |                                                           |                                                      |                                                                  |                                                                     |                                              |                                                                                                      |
|-------------------------------------------------------------------------|---|----|------|-----|-----|-----------------------------------------------------------|------------------------------------------------------|------------------------------------------------------------------|---------------------------------------------------------------------|----------------------------------------------|------------------------------------------------------------------------------------------------------|
| Möhn et al, Journal of Neurology                                        | m | 42 | RRMS | 0   | 7   | Teriflunomide (7 years), methylprednisolone 1g/d, 4 days) | None                                                 | None                                                             | Nausea, vomiting, general weakness, fever, hypotension, tachycardia | None                                         | Hospitalized, discharged without residual symptoms                                                   |
| Novi et al, Multiple Sclerosis and related disorders                    | m | 58 | PPMS | 6.0 | 11  | Ocrelizumab (2 years)                                     | Interferon beta 1-a, glatiramer acetate, fingolimod  | <b>Asthma</b>                                                    | Fever, cough                                                        | None                                         | Hospitalized for 2 days, discharged without residual symptoms                                        |
| Rimmer et al, Multiple Sclerosis Journal                                | f | 51 | RRMS | 6.5 | 8   | Natalizumab (7 years)                                     | Interferon beta 1-a                                  | <b>Obesity, hypertension, recurrent urinary tract infections</b> | Fever, cough, dyspnea, ARDS                                         | Hydroxychloroquine, antibiotics              | <b>Intensive care unit treatment, intubation + vasopressors, death 12 days after hospitalization</b> |
| Suwanwongse & Shabarek, Multiple Sclerosis and related disorders        | m | 31 | N/A  | N/A | N/A | Ocrelizumab (2 years)                                     | N/A                                                  | <b>Obesity</b>                                                   | Cough, dyspnea, nausea, vomiting, diarrhea                          | Hydroxychloroquine                           | Hospitalized for 5 days, discharged without residual symptoms                                        |
| Rempe Thornton & Harel, Multiple Sclerosis and related disorders        | m | 42 | RRMS | N/A | 4   | Ocrelizumab (9 months)                                    | N/A                                                  | None                                                             | Fever, cough, impaired taste, dyspnea                               | None                                         | Not hospitalized, dysgeusia persisted > 1 month                                                      |
|                                                                         | f | 39 | RRMS | N/A | 5   | Ocrelizumab (4 months)                                    | N/A                                                  | None                                                             | Cough                                                               | None                                         | Not hospitalized, mild symptoms, complete recovery                                                   |
| Valencia-Sanchez & Wingerchuk, Multiple Sclerosis and related disorders | f | 58 | RRMS | 6.0 | 13  | Fingolimod (9 years)                                      | Interferon beta 1-a, glatiramer acetate, natalizumab | <b>Diabetes mellitus, hypertension, obesity, TIA</b>             | Fever, cough, dyspnea                                               | Hydroxychloroquine, antibiotics, tocilizumab | <b>Intensive care unit treatment, intubation, vasopressors, residual hyposmia and dysgeusia</b>      |
| Woo et al, Journal of Neurology                                         | f | 44 | RRMS | 2.0 | 21  | Rituximab (7 years)                                       | N/A                                                  | Breast carcinoma                                                 | Fever, cough, malaise, myalgia, dyspnea                             | None                                         | Hospitalized for 4 days, discharged without residual symptoms                                        |
| Wurm et al, Multiple Sclerosis Journal                                  | f | 59 | N/A  | 6.0 | 4   | Rituximab (2.5 years)                                     | N/A                                                  | N/A                                                              | Fever, cough, dyspnea, headache, nausea                             | Antibiotics                                  | Hospitalized for 13 days, discharged without residual symptoms                                       |

**Supplementary Table 1:** Detailed overview of published case reports on SARS-CoV-2 positive MS patients. ARDS: acute respiratory distress syndrome; COPD: chronic obstructive pulmonary disease; COVID-19: coronavirus disease 2019; DMF: dimethylfumarate; DMT: disease modifying therapy; EDSS: Expanded Disability Status Scale; f: female; m: male; MS: multiple sclerosis; N/A: not applicable; PPMS: primary progressive multiple sclerosis; RRMS: relapsing-remitting multiple sclerosis; SPMS: secondary progressive multiple sclerosis;
